# Supplementary material for: Immunologic Effects of Stereotactic Body Radiotherapy in Dogs with Spontaneous Tumors and the Impact of Intratumoral OX40/TLR Agonist Immunotherapy
Source: MDPI journal article supplement (doi:10.3390/ijms23020826), 2022-01-13
Supplement: s1 [file s1]

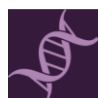

Article

# Immunologic Effects of Stereotactic Body Radiotherapy in Dogs with Spontaneous Tumors and the Impact of Intratumoral OX40/TLR Agonist Immunotherapy

Mary-Keara Boss <sup>1,\*</sup>, Remy Watts <sup>2</sup>, Lauren G. Harrison <sup>1</sup>, Sophie Hopkins <sup>3</sup>, Lyndah Chow <sup>3</sup>, Erin Trageser <sup>1</sup>, Carina Easton <sup>4</sup>, Susan M. LaRue <sup>1</sup>, Daniel Regan <sup>4</sup>, Mark W. Dewhirst <sup>5</sup> and Steven Dow <sup>3</sup>

<sup>1</sup> Department of Environmental Health and Radiological Sciences, Colorado State University, Fort Collins, CO 80523, USA; lauren.harrison@colostate.edu (L.G.H.); erin.trageser@colostate.edu (E.T.); susan.larue@colostate.edu (S.M.L.)

<sup>2</sup> Department of Companion Animals, Atlantic Veterinary College, Charlottetown, PE C1A 4P3, Canada; rwatts5391@upei.ca

<sup>3</sup> Department of Clinical Sciences, Colorado State University, Fort Collins, CO 80523, USA; leone.hopkins@colostate.edu (S.H.); Lyndah.chow@colostate.edu (L.C.); steven.dow@colostate.edu (S.D.)

<sup>4</sup> Department of Microbiology, Immunology, and Pathology, Colorado State University, Fort Collins, CO 80523, USA; carina.easton@colostate.edu (C.E.); daniel.regan@colostate.edu (D.R.)

<sup>5</sup> Department of Radiation Oncology, Duke University Medical Center, Durham, NC 27710, USA; mark.dewhirst@duke.edu

\* Correspondence: keara.boss@colostate.edu

| Gene Name |
|-----------|
| BCL6      |
| CCL2      |
| CD27      |
| CD274     |
| CD28      |
| CD3e      |
| CD40      |
| CD70      |
| CD8a      |
| CLEC4C    |
| CTLA4     |
| CXCL2     |
| FOXP3     |
| GATA3     |
| GPR146    |
| GZMA      |
| GZMB      |
| HLA-A     |
| ICOS      |
| ICOSLG    |
| IFNg      |
| IL 18     |
| IL10      |
| IL12      |
| IL2       |
| IL6       |
| IL8       |
| KDM6B     |
| LAG3      |
| MX1       |

---

|                      |
|----------------------|
| NCR1                 |
| OX40                 |
| Pax5                 |
| PD-1                 |
| PDCD1LG2             |
| PD-L1                |
| PRF1                 |
| RORC                 |
| SELP                 |
| TBX                  |
| TGFb                 |
| TNF                  |
| TNFSF10              |
| TNFSF14              |
| ALAS1 (Housekeeping) |
| GUSB (Housekeeping)  |
| RPL30 (Housekeeping) |
| SDHA (Housekeeping)  |

---
